# Supplementary material
Source: PubMed Central journal article supplement (PMC5877794)
Supplement: NIHMS577840-supplement-ESI.pdf [file NIHMS577840-supplement-ESI.pdf]

# **Supporting Information**

*for*

*Photoresponsive hydrogel networks using melanin nanoparticle  
photothermal sensitizers*

*By*

*Chi Ninh, Madeline Cramer, and Christopher J Bettinger*

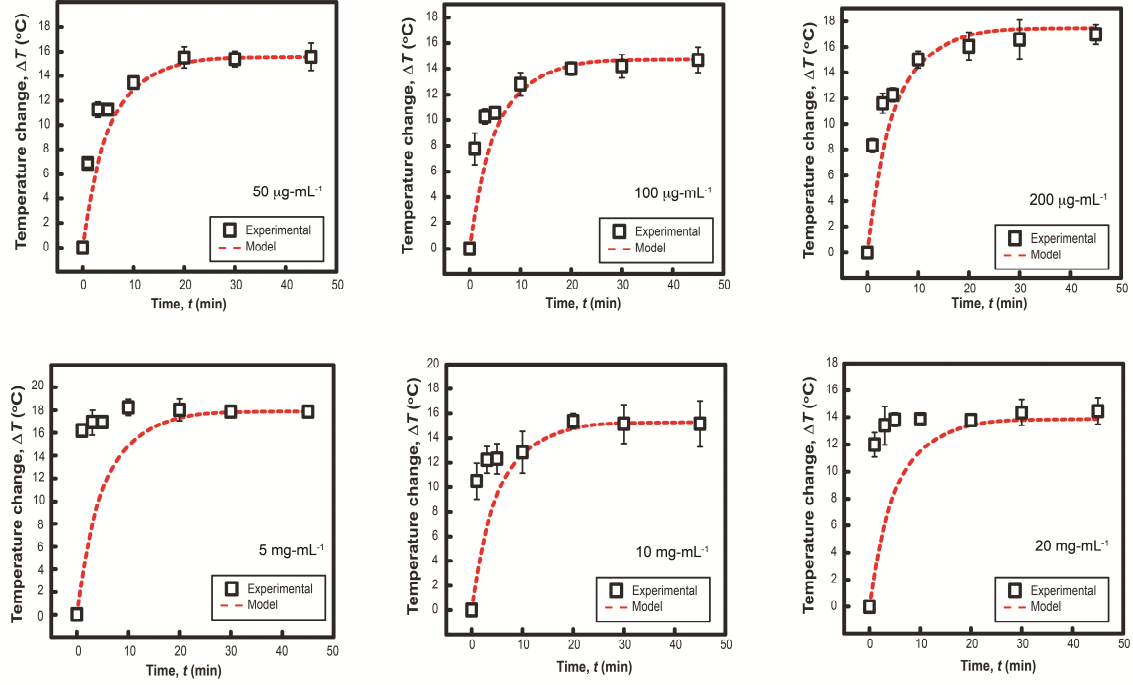

**Figure S1.** Temporal evolution of photothermal heating of MelNP dispersions with different concentrations ranging from  $50 \mu\text{g}\cdot\text{mL}^{-1}$  to  $20 \text{mg}\cdot\text{mL}^{-1}$ . The predicted transient temperature profiles matched that of experimentally determined values at low concentrations of MelNP ( $\leq 5 \text{mg}\cdot\text{mL}^{-1}$ ). However, the temporal temperature profiles deviated significantly from experimental observations as the MelNP concentration was increased (See Text).

### Detailed Calculations of Photo-Induced Heating of Melanin Nanoparticle Dispersions

MelNPs dispersions and MelNP-loaded hydrogels are prepared in scintillation vials to facilitate formation and optical thermal characterization. The heating rate of photo-induced aqueous melanin nanoparticle dispersions was determined by

$$\sum_i m_i C_{p,i} \frac{dT}{dt} = Q_{in} - Q_{out} \quad \text{Eqn. S1}$$

In this equation,  $m_i$  and  $C_{p,i}$  represent the mass and heat capacity of component  $i$ ,  $T$  represents the temperature of the aqueous dispersion. The value of  $m_{H_2O}$  and  $C_{p,H_2O}$  were taken as 1 g per mL and  $4.18 \text{J}\cdot\text{g}^{-1}\cdot\text{K}^{-1}$  respectively. The value of  $m_{MelNP}$  varies with MelNP concentration while  $2.51 \text{J}\cdot\text{g}^{-1}\cdot\text{K}^{-1}$  was used as the value of  $C_{p,MelNP}$ . The rate of energy supplied was calculated using Eqn 2.

$$Q_{in}(z) = \frac{dI(z)}{dz} \quad \text{Eqn. S2}$$

The absorbed light intensity is calculated using the following relationship derived from the Beer-Lambert law.

$$I = I_0(1 - e^{-\beta z}) \quad \text{Eqn. S3}$$

$I_0$  was measured to be 10.8 mW·m<sup>-2</sup>. The value of  $\beta$  was estimated using the following input parameters for Mie scattering (reference 34 in main text). Briefly, the refractive index mismatch ratio ( $n_{MelNP}/n_{water}$ ) and the size parameter ( $x = 2\pi D_{MelNP}/(\lambda/n_{water})$ ) were calculated. The indices of refraction of melanin and water are given by  $n_{MelNP} = 1.3$  and  $n_{water} = 1.33$ , respectively. The value  $N_{MelNP}$  represents the number density of MelNP nanoparticles in solution assuming a spherical particle of diameter  $D_{MelNP} = 2R_g = 200$  nm. This calculation uses a melanin mass density of 1.68 g·cm<sup>-3</sup> (reference 28 in main text). We used an algorithm to calculate the efficiency of scattering  $Q_s$  (reference 40 in the main text). Briefly, the algorithm was based on the following equation:

$$Q_s = \frac{2}{x^2} \sum_{n=1}^N (2n+1)(|a_n|^2 + |b_n|^2) \quad \text{Eqn. S4}$$

where the complex Mie coefficients  $a_n$  and  $b_n$  were functions depending on  $x$  and the complex refractive index<sup>1</sup>. The output values of  $\beta$  ( $Q_s SA_{MelNP} N_{MelNP}$ ) are summarized in **Table S1**.

**Table S1.** Scattering coefficients used for aqueous melanin dispersions as a function of melanin nanoparticle concentration.

| MelNP<br>conc, $c_{MelNP}$<br>(mg·mL <sup>-1</sup> )                       | 0.05   | 0.1    | 0.2    | 1     | 5     | 10    | 20    |
|----------------------------------------------------------------------------|--------|--------|--------|-------|-------|-------|-------|
| Scattering<br>coefficient<br>$\beta \times 10^{-2}$<br>(cm <sup>-1</sup> ) | 0.1090 | 0.1109 | 0.1330 | 0.160 | 0.747 | 1.254 | 2.259 |

Heat loss was dominated by radial thermal conduction through the walls of the glass vials. The rate of heat loss  $Q_{out}$  is calculated using Eqn 4:

$$Q_{out} = -k_{SiO_2} S \frac{dT}{dr_{shell}} \quad \text{Eqn. 4}$$

In this expression,  $k_{SiO_2}$  represents the heat transfer coefficient of silicon oxide ( $1 \text{ W}\cdot\text{m}^{-1}\cdot\text{K}^{-1}$ ),  $S$  is the surface area of conduction and  $r_{shell}$  is the coordinate within the silicon oxide shell between the inner ( $R_{in}$ ) and outer radii ( $R_{out}$ ) of the conduction path where  $|R_{out} - R_{in}| \ll R_{in}$ . The symbol  $k_{SiO_2}$  represents the heat transfer coefficient of silicon oxide ( $1 \text{ W}\cdot\text{m}^{-1}\cdot\text{K}^{-1}$ ). The inner ( $R_{in}$ ) and outer ( $R_{out}$ ) radii was measured to be 1.59 cm and outer radii ( $R_{out}$ ) was 1.68 cm.

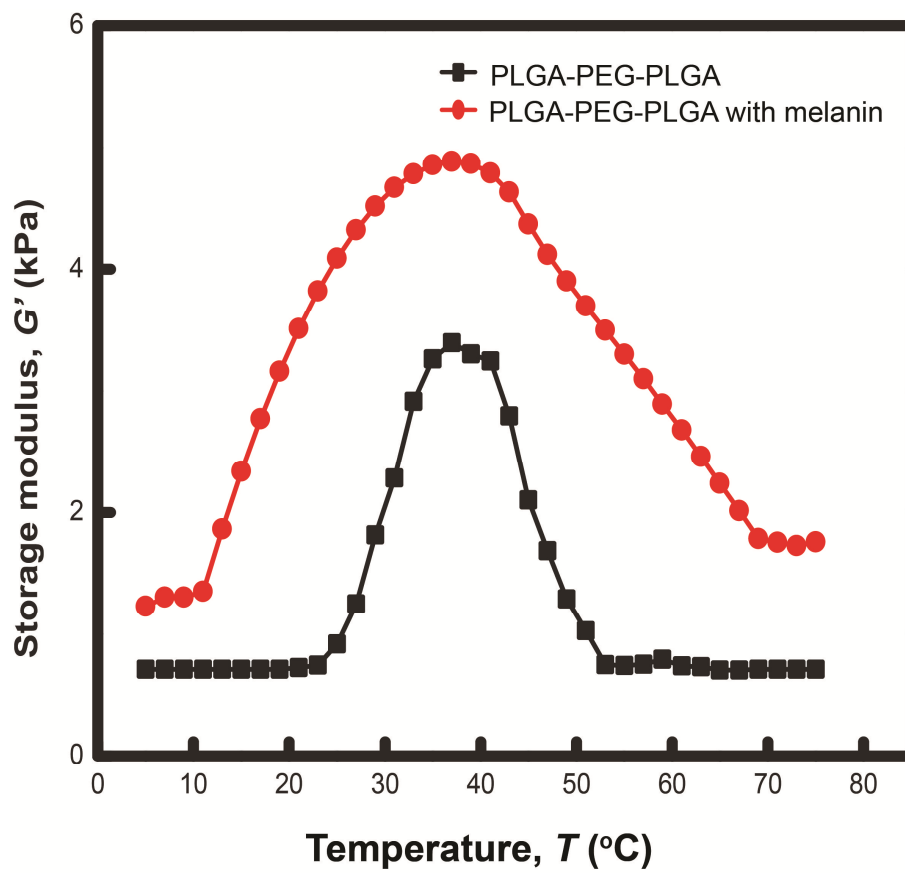

**Figure S2.** Phase transition behavior of hydrogel formed from  $200 \text{ mg}\cdot\text{mL}^{-1}$  PLGA-PEG-PLGA concentrations. Loading MelNP expands the gel transition of the hydrogel by accelerating sol-gel transition and retarding precipitation (See Text).

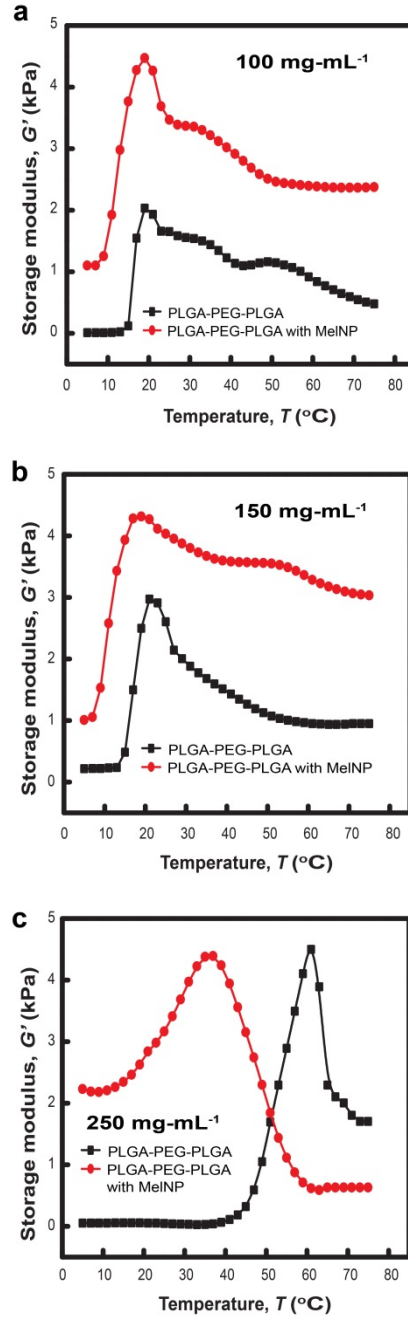

**Figure S3.** Phase transition behavior of hydrogel formed from different PLGA-PEG-PLGA concentrations: a) 100 mg·mL<sup>-1</sup>, b) 150 mg·mL<sup>-1</sup>, and c) 250 mg·mL<sup>-1</sup> with and without 1 mg·mL<sup>-1</sup> MeINP. Loading MeINP expands the gel transition of the hydrogel by accelerating sol-gel transition and retarding precipitation (See Text).

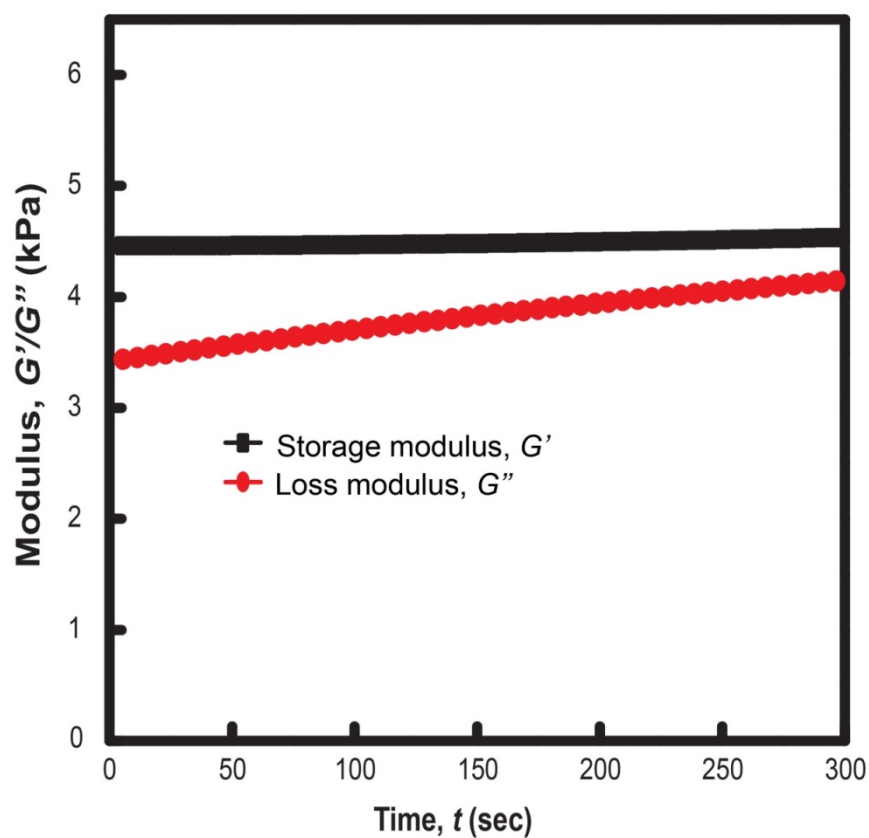

**Figure S4.** Hydrogel formed from  $200 \text{ mg}\cdot\text{mL}^{-1}$  solution of PLGA-PEG-PLGA doped with  $1 \text{ mg}\cdot\text{mL}^{-1}$  MeINP was exposed to UV light. No change in  $G'$  was observed over irradiation time, suggesting that the decrease in  $G'$  of PLGA-PEGPLGA hydrogel with embedded MeINP (Fig. 7) resulted from the photothermal response of the MeINP. A slight increase of  $G''$  was observed possibly due to dehydration of the hydrogel during UV irradiation time.

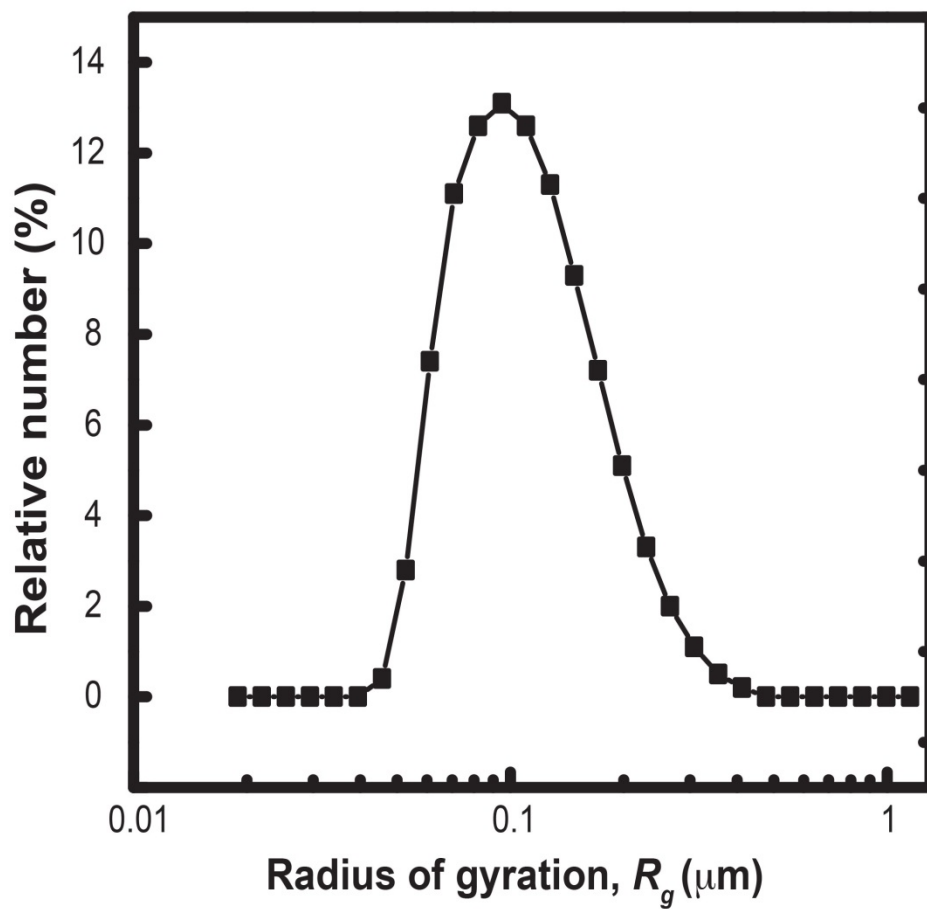

**Figure S5.** Size distribution of MeINP at concentration  $1 \text{ mg}\cdot\text{mL}^{-1}$  was measured by dynamic light scattering.



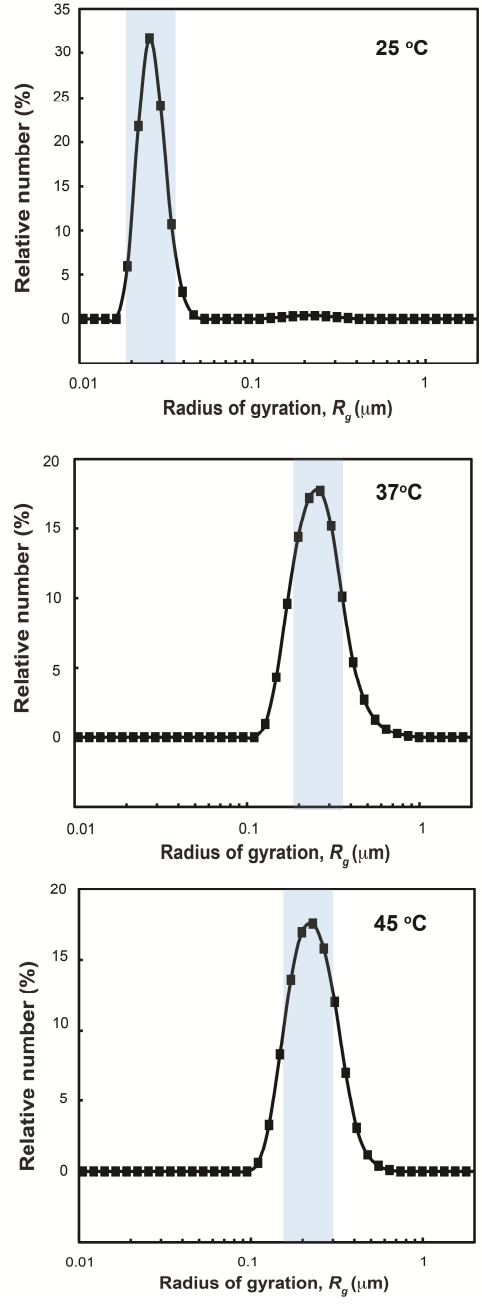

**Figure S6.** Size distribution of pristine PLGA-PEG-PLGA micelles was measured by dynamic light scattering at 25, 37, and 45 °C.

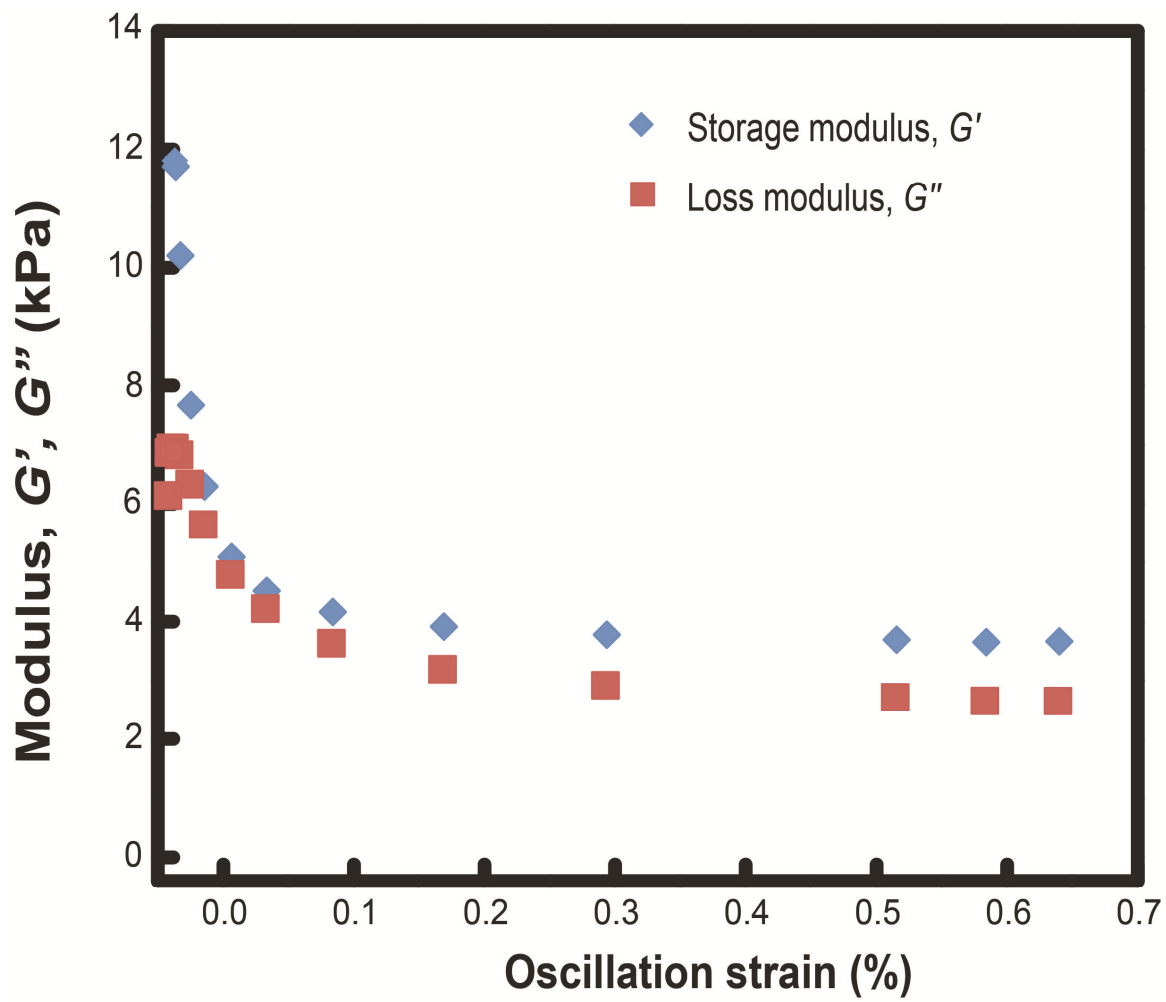

**Figure S7.** Amplitude sweep of hydrogel PLGA-PEG-PLGA doped with  $1\text{mg}\cdot\text{mL}^{-1}$  MeNP at  $\omega = 5\text{rad/s}$  shows that the parameter chosen (0.5% strain) is in the linear viscoelastic regime.

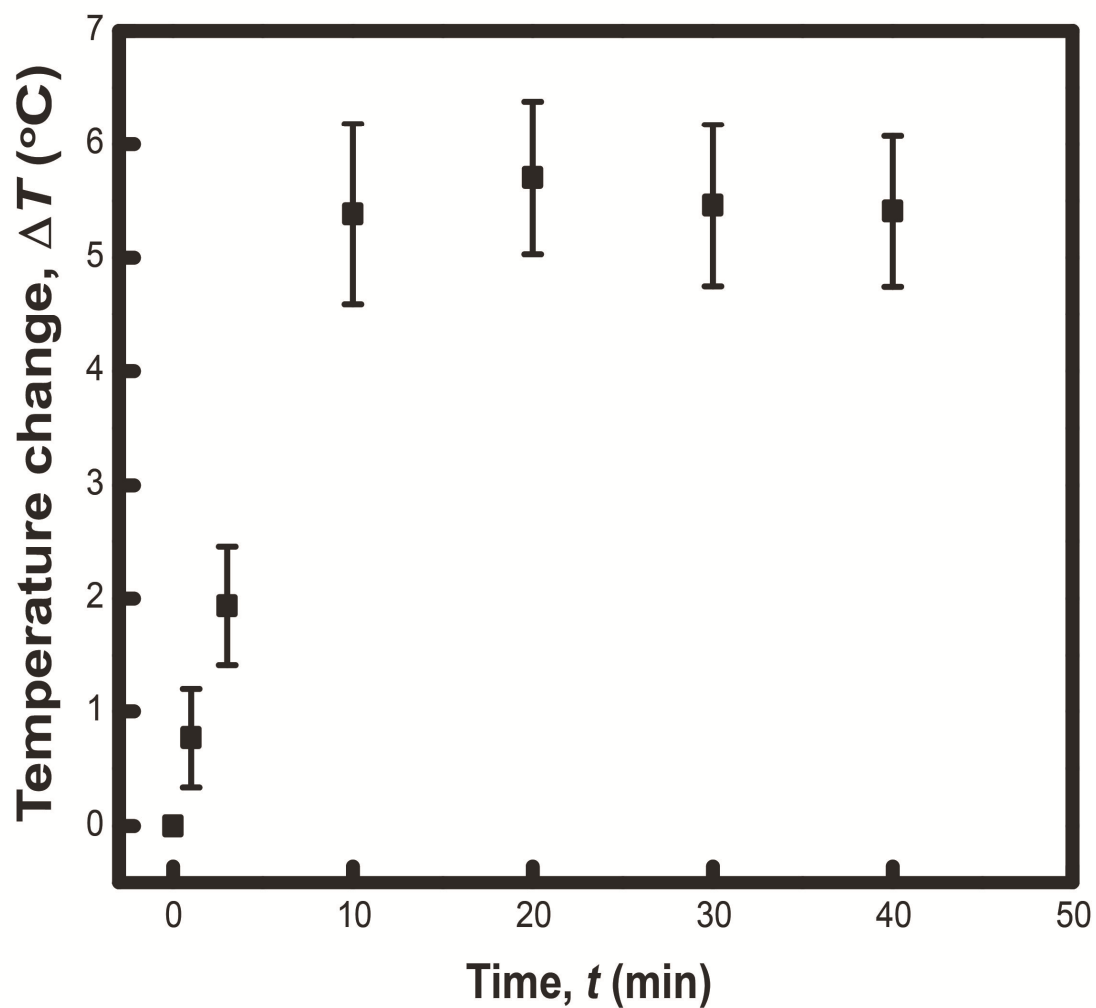

**Figure S8.** Photothermal response of hydrogel formed from  $200 \text{ mg}\cdot\text{mL}^{-1}$  PLGA-PEG-PLGA to UV irradiation shows an increase of  $5.4 \pm 0.6 \text{ }^{\circ}\text{C}$ . This temperature increase is significantly smaller compared to the increase of  $20.4 \pm 0.1 \text{ }^{\circ}\text{C}$  that is achievable with aqueous dispersions of  $1 \text{ mg}\cdot\text{mL}^{-1}$  MeINP (Fig.3).

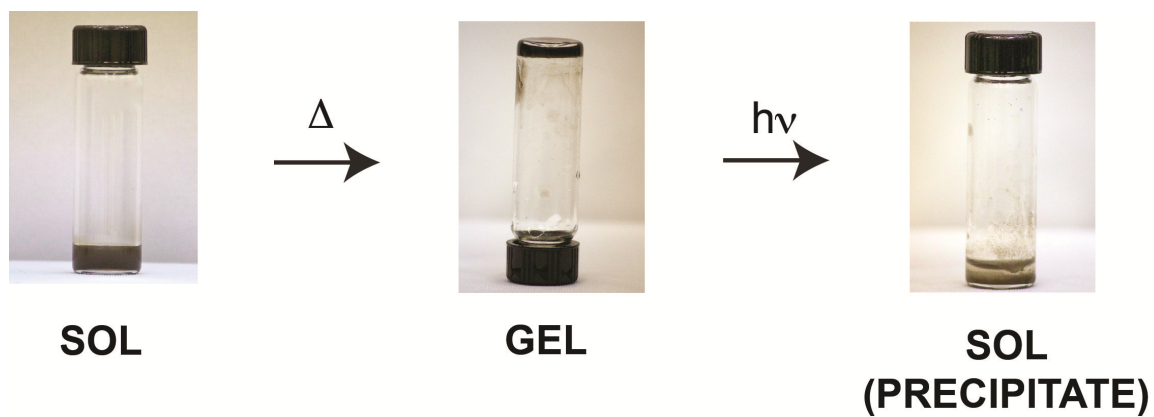

**Figure S9.** Photographic images of hydrogel formed from 200 mg-mL<sup>-1</sup> PLGA-PEG-PLGA doped with 1 mg-mL<sup>-1</sup> MeNP undergoing phase transitions from SOL to GEL to PRECIPITATE after UV irradiation for 30 minutes.

**Table S2.** The total free energy of adsorption of PLGA-PEG-PLGA to MeINP ( $\Delta G_{ads,vol}$ ) was calculated and compared to the competing process of gelation ( $\Delta G_{gel}$ ). This calculation is consistent with the trends in gelation versus MeINP concentration (See Text).

| MeINP Concentration<br>$c_{MeINP}$ (mg-mL <sup>-1</sup> ) | $\Delta G_{ads,vol}$ (J-mL <sup>-1</sup> ) <sup>a</sup> | $\Delta G_{gel}$ (J-mL <sup>-1</sup> ) <sup>b</sup> | Gel formation |
|-----------------------------------------------------------|---------------------------------------------------------|-----------------------------------------------------|---------------|
| 0.05                                                      | -0.05                                                   | -6.1                                                | Yes           |
| 0.1                                                       | -0.11                                                   | ”                                                   | Yes           |
| 0.2                                                       | -0.22                                                   | ”                                                   | Yes           |
| 1                                                         | -1.08                                                   | ”                                                   | Yes           |
| 5                                                         | -5.34                                                   | ”                                                   | Yes           |
| 10                                                        | -16.1                                                   | ”                                                   | No            |
| 20                                                        | -32.3                                                   | ”                                                   | No            |

<sup>a</sup>Calculated from Eqns. 5 and 6 of main text.

<sup>b</sup>Constant value for all compositions. Taken from reference 45 of main text.

### Additional References

1. W. J. Wiscombe, *Applied optics*, 1980, 19, 1505-1509.
2. N. P. Bansal and R. H. Doremus, *Handbook of glass properties*, 1986.
